# Supplementary material for: Stereochemically active lone-pair-driven giant enhancement of birefringence from three-dimensional CsZn4Ga5Se12 to two-dimensional CsZnAsSe3
Source: Royal Society of Chemistry journal article supplement (doi:10.1039/d3qi00504f), 2023-01-01
Supplement: d3qi00504f1.pdf [file d3qi00504f1.pdf]

## Electronic Supplementary Information (ESI)

---

# Stereochemically-active-lone-pair-driven giant enhancement of birefringence from three-dimensional $\text{CsZn}_4\text{Ga}_5\text{Se}_{12}$ to two-dimensional $\text{CsZnAsSe}_3$

Chao Zhang,<sup>‡a</sup> Mao-Yin Ran,<sup>‡b,c,d</sup> Xin Chen,<sup>a</sup> Sheng-Hua Zhou,<sup>b,c,d</sup> Hua Lin,<sup>\*,b,c</sup> and Yi Liu<sup>\*,a</sup>

<sup>a</sup>*Institute for Composites Science Innovation (InCSI), School of Materials Science and Engineering, Zhejiang University, Hangzhou 310027, China*

<sup>b</sup>*Fujian Science & Technology Innovation Laboratory for Optoelectronic Information of China, Fuzhou 350108, China*

<sup>c</sup>*State Key Laboratory of Structural Chemistry, Fujian Institute of Research on the Structure of Matter, Chinese Academy of Sciences, Fuzhou 350002, China*

<sup>d</sup>*University of Chinese Academy of Sciences, Beijing 100049, China*

<sup>‡</sup>*C. Zhang and M. Y. Ran contributed equally to this work.*

<sup>\*</sup>*E-mail: liuyimse@zju.edu.cn and linhua@fjirsm.ac.cn.*

## Electronic Supplementary Information Index

### 1. Experimental Section

1.1 Birefringence Measurements

1.2 Single-Crystal Structure Characterizations

### 2. Computational Details

### 3. Figures and Tables

**Figure S1.** Coordination environment and bond lengths (Å) of a  $\text{Cs@Se}_{12}$  polyhedron in  $\text{CsZn}_4\text{Ga}_5\text{Se}_{12}$ .

**Figure S2.** Coordination environment and bond lengths (Å) of a  $\text{Cs@Se}_8$  polyhedron in  $\text{CsZnAsSe}_3$ .

**Figure S3.** (a) SEM image and (b) EDX analysis of  $\text{CsZnAsSe}_3$ .

**Figure S4.** Optical transmittance spectra of  $\text{CsZnAsSe}_3$ .

**Table S1.** Selected bond lengths (Å) for  $\text{CsCu}_3\text{SbS}_4$ .

### 4. References

## **1. Experimental Section**

### **1.1 Birefringence Measurements**

The birefringence ( $\Delta n$ ) was characterized by using the polarizing microscope (ZEISS Axio Scope, A1) equipped with Berek compensator. The wavelength of the light source was 546 nm. The formula for calculating the  $\Delta n$  is  $R = |N_e - N_o| \times T = \Delta n \times T$ . Here,  $R$  represents the optical path difference and  $T$  denotes the thickness of the crystal.

### **1.2 Single-Crystal Structure Characterizations**

Suitable single crystals of the title compounds were mounted on the glass fibers. Diffraction data were collected by an Oxford Xcalibur (Atlas Gemini ultra) diffractometer with a graphite-monochromated Mo- $K_\alpha$  radiation ( $\lambda = 0.71073 \text{ \AA}$ ) at room temperature. The absorption corrections were based on the multi-scan method. The structures were solved by the direct methods and refined by the full-matrix least-squares fitting on  $F^2$  using the *SHELXL-2014* software package.<sup>1</sup> The assignments of Cs, Zn, As, and Se were determined on the basis of the interatomic distances, coordination environments and relative displacement parameters. The structure was verified using the *ADDSYM* algorithm from the program *PLATON*.<sup>2</sup> Crystal data and refinement details are summarized in Tables 1 and 2, the selected bond lengths are listed in Table S1. CCDC number: 2215339.

## **2 Computational Details**

Crystallographic data determined by single crystal X-ray diffraction were used for theoretical calculations of their electronic band structures. The density functional

## *Electronic Supplementary Information (ESI)*

---

theory (DFT) calculations have been performed using the Vienna ab initio simulation package (VASP)<sup>3-5</sup> with the Perdew-Burke-Ernzerhof (PBE)<sup>6</sup> exchange correlation functional. The projected augmented wave (PAW)<sup>7</sup> potentials have been used to treat the ion-electron interactions. A  $\Gamma$ -centered  $7 \times 7 \times 9$  Monkhorst-Pack grid for the Brillouin zone sampling and a cutoff energy of 800 eV for the plane wave expansion were found to get convergent lattice parameters and self-consistent energies.

3. Figures and Tables

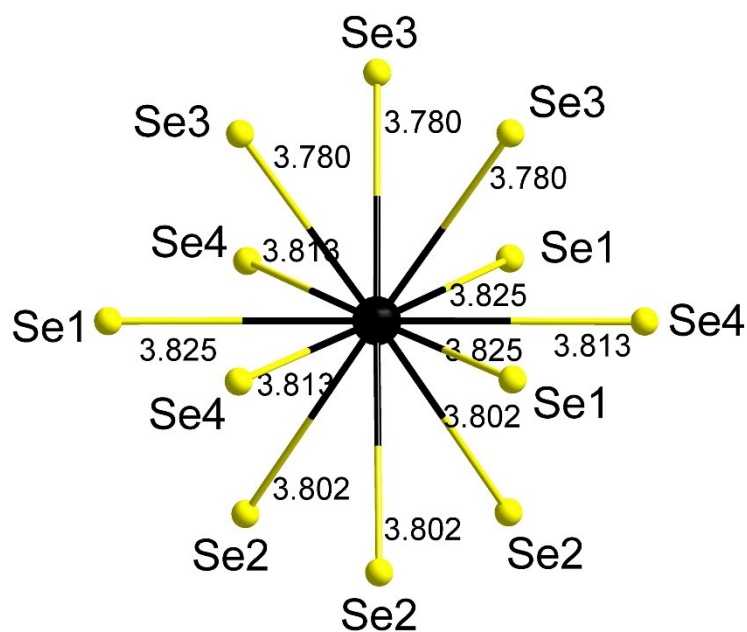

**Figure S1.** Coordination environment and bond lengths (Å) of a Cs@Se<sub>12</sub> polyhedron in CsZn<sub>4</sub>Ga<sub>5</sub>Se<sub>12</sub>.

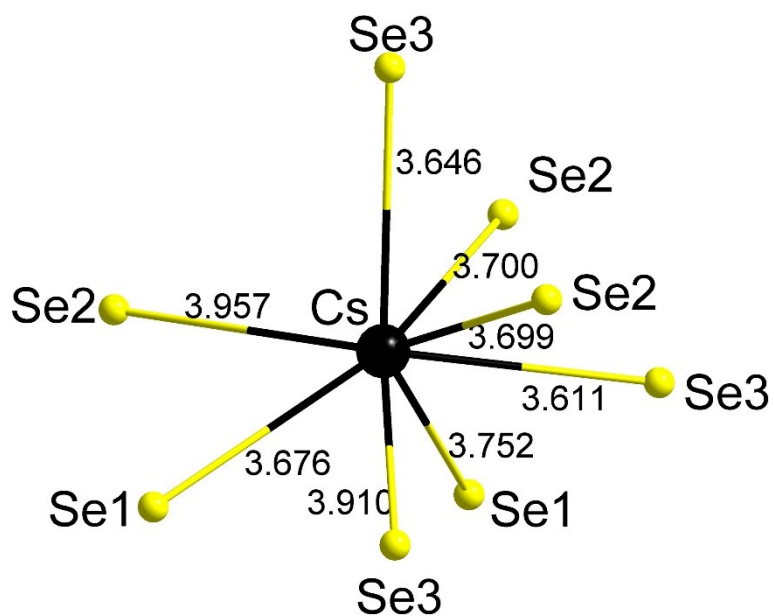

**Figure S2.** Coordination environment and bond lengths (Å) of a Cs@Se<sub>8</sub> polyhedron in CsZnAsSe<sub>3</sub>.

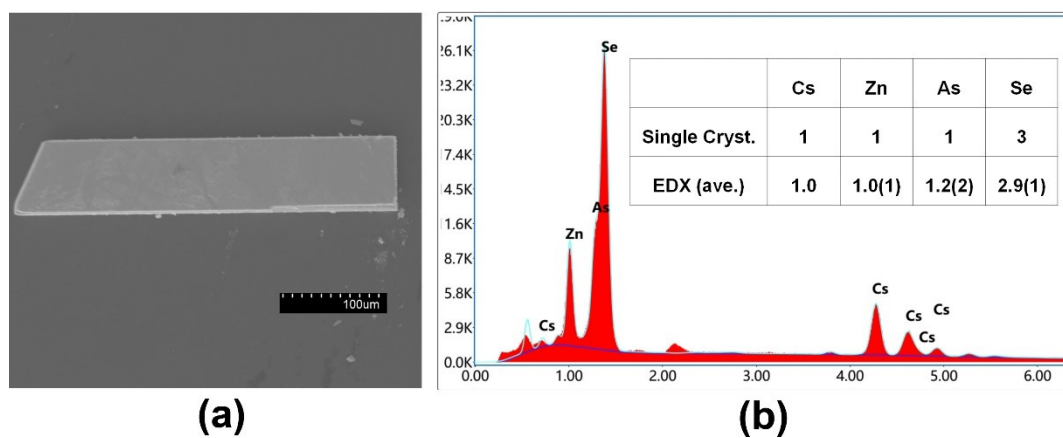

Figure S3. (a) SEM image and (b) EDX analysis of  $\text{CsZnAsSe}_3$ .

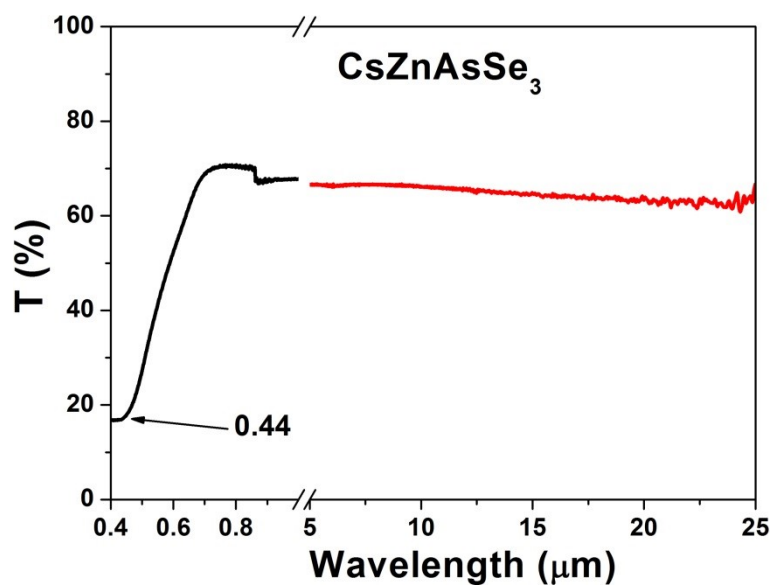

Figure S4. Optical transmittance spectra of  $\text{CsZnAsSe}_3$ .

*Electronic Supplementary Information (ESI)*

---

**Table S1.** Selected bond lengths (Å) for CsZnAsSe<sub>3</sub>.

---

|        |            |           |           |
|--------|------------|-----------|-----------|
| Zn–Se3 | 2.4439(14) | ∠S3–Zn–S2 | 117.32(5) |
| Zn–Se2 | 2.4440(13) | ∠S3–Zn–S1 | 118.52(5) |
| Zn–Se1 | 2.4680(13) | ∠S2–Zn–S1 | 102.15(5) |
| Zn–Se1 | 2.5316(13) | ∠S3–Zn–S1 | 97.98(5)  |
| As–Se3 | 2.3605(11) | ∠S2–Zn–S1 | 108.48(5) |
| As–Se2 | 2.3710(12) | ∠S1–Zn–S1 | 112.42(5) |
| As–Se1 | 2.4196(11) | ∠S3–As–S2 | 102.38(4) |
| Cs–Se3 | 3.6111(9)  | ∠S3–As–S1 | 102.47(4) |
| Cs–Se3 | 3.6459(9)  | ∠S2–As–S1 | 97.89(4)  |
| Cs–Se1 | 3.6758(9)  |           |           |
| Cs–Se2 | 3.6994(9)  |           |           |
| Cs–Se2 | 3.7000(9)  |           |           |
| Cs–Se1 | 3.7517(9)  |           |           |
| Cs–Se3 | 3.9104(10) |           |           |
| Cs–Se2 | 3.9570(2)  |           |           |

---

#### 4. References

- (1) Sheldrick, G. M. A short history of SHELX, *Acta Crystallogr., Sect. A: Found. Crystallogr.*, 2008, 112–122.
- (2) A. L. Spek, Single-crystal structure validation with the program PLATON, *J. Appl. Cryst.*, 2003, **36**, 7–13.
- (3) M. D. Segall, P. J. D. Lindan, M. J. Probert, C. J. Pickard, P. J. Hasnip, S. J. Clark and M. C. Payne, First-principles simulation: ideas, illustrations and the CASTEP code, *J. Phys.: Condens. Matter*, 2002, **14**, 2717–2744.
- (4) G. Kresse, VASP, 5.3.5; <http://cms.mpi.univie.ac.at/vasp/vasp/vasp.html>.
- (5) G. Kresse and J. Furthmuller, Efficient iterative schemes for ab initio total-energy calculations using a plane-wave basis set, *Phys. Rev. B: Condens. Matter*, 1996, **54**, 11169–11186.
- (6) G. Kresse and D. Joubert, From ultrasoft pseudopotentials to the projector augmented-wave method, *Phys. Rev. B: Condens. Matter*, 1999, **59**, 1758–1775.
- (7) J. P. Perdew, K. Burke and M. Ernzerhof, Generalized gradient approximation made simple, *Phys. Rev. Lett.*, 1996, **77**, 3865–3868.
